# Design of a Synthetic sRNA-based Feedback Filter Module\*

Nicolas Delalez<sup>1</sup>, Aivar Sootla<sup>1</sup>, George H. Wadhams<sup>2</sup>, and Antonis Papachristodoulou<sup>1</sup>

<sup>1</sup>Department of Engineering Science, Oxford University, Oxford, United Kingdom

<sup>2</sup>Department of Biochemistry, Oxford University, Oxford, United Kingdom

December 21, 2018

## Summary

Filters are widely used in engineering to reduce noise and/or the magnitude of a signal of interest. Feedback filters, or adaptive filters, are preferred if the signal noise distribution is unknown. One of the main challenges in Synthetic Biology remains the design of reliable constructs but these often fail to work as intended due, e.g. to their inherent stochasticity and burden on the host. Here we design, implement and test experimentally a biological feedback filter module based on small non-coding RNAs (sRNAs) and self-cleaving ribozymes. Mathematical modelling demonstrates that it attenuates noise for a large range of parameters due to negative feedback introduced by the use of ribozymes and sRNA. Our module modifies the steady-state response of the filtered signal, and hence can be used for tuning the feedback strength while also reducing noise. We demonstrated these properties theoretically on the TetR autorepressor, enhanced with our sRNA module.

## 1 Introduction

Synthetic Biology aims to design new or re-design existing biological devices and systems for a particular purpose. Examples include the design of ‘cellular factories’ producing valuable chemical compounds, biosensors capable of detecting toxins or viruses in a cell culture [Brophy and Voigt, 2014, Purnick and Weiss, 2009, Freemont and Kitney, 2015], or drug delivery systems [Zhou, 2016, Ozdemir et al., 2018]. Exploiting the intracellular machinery allows the synthesis of organic compounds that cannot be easily produced by other means, leading to novel applications in biotechnology, bioprocess engineering and cell-based medicine. However, one of the main challenges in Synthetic Biology remains the design of genetic systems that can be implemented in a predictable and robust way. Due to uncertainty, noise, burden and cross-talk inherent to biological systems, synthetic circuits can fail to work as intended. Indeed, elevated levels of protein production induce a high burden on the cell, notably by sequestering resources for transcription and translation (e.g. RNA polymerases and ribosomes) [Ceroni et al., 2015]. Operating at elevated protein production levels can also increase variability in the protein production due to intrinsic noise. To avoid these issues, common strategies to reduce the level of protein expression are to reduce the strength of promoters, the efficiency of the ribosome-binding site (RBS) or the plasmid copy number. However, transcriptional control is generally system dependent, diminishing the reliability of these approaches.

Filtering techniques are often used in signal processing, feedback control theory and communication systems to reduce signal noise [Haykin, 2002]. Filters can be classified into feedforward and feedback (or adaptive) filters. Feedforward filters are generally used when the

---

\*The first two authors contributed equally to this work. Correspondence should be addressed to Antonis Papachristodoulou [ANTONIS@ENG.OX.AC.UK](mailto:ANTONIS@ENG.OX.AC.UK).

41 noise statistics are known or can be estimated *a priori*; their output is the difference be-  
42 tween the signal of interest and a modification of the same signal. Feedback filters auto-  
43 matically adjust their behaviour by comparing the output signal to the signal of interest at  
44 the input of the filter and thus are more favourable for signals corrupted by unknown noise  
45 distributions. In the context of Systems and Synthetic Biology, filtering capabilities of sig-  
46 nalling cascades [Hooshangi et al., 2005, Thattai and van Oudenaarden, 2002], annihilation mo-  
47 tifs [Laurenti et al., 2018] and other motifs [Samoilov et al., 2002] were studied *in silico*. Feed-  
48 forward band-pass filters, which pass the signal only in a specific band of frequencies, have  
49 been constructed *in vivo* [Sohka et al., 2009], [Muranaka and Yokobayashi, 2010], while a noise  
50 attenuating feedforward filter was proposed and implemented *in vitro* in [Zechner et al., 2016].

51 The design of feedback filters is often performed with the help of feedback control theory,  
52 which has proven useful to render uncertain systems more reliable and robust to perturba-  
53 tions [Åström and Murray, 2008, Del Vecchio and Murray, 2015, Iglesias and Ingalls, 2010]. In  
54 a feedback loop, the output signal is measured and then used to modify the input of the sys-  
55 tem. In the filter design case, the controlled system is trivial: the signal corrupted by noise.  
56 Feedback control theory methods have been successfully applied in synthetic biology previ-  
57 ously [Steel et al., 2017b], [Hsiao et al., 2018], [Ang and McMillen, 2013], [Briat et al., 2016],  
58 [El-Samad et al., 2002], [Del Vecchio et al., 2008], [Lillacci et al., 2018], [Cantone et al., 2009].  
59 For example, in order to achieve a desired protein expression level an external computer was  
60 used to decide the input to the system (chemical or light induction) based on output mea-  
61 surements [Menolascina et al., 2011, Miliadis-Argeitis et al., 2011, Uhlenhof et al., 2012]. Such  
62 systems have inherent drawbacks, as control is achieved by interfacing the living cells with a  
63 digital computer that implements the control system.

64 Over the past few years, focus has shifted towards designing self-contained *in vivo* con-  
65 trollers. While the vast majority of these experimental implementations were protein-based  
66 [Hsiao et al., 2014, Folliard et al., 2017, Rosenfeld et al., 2002] small non-coding RNAs (sRNAs)  
67 have also been recently used in this context [Ghodasara and Voigt, 2017, Takahashi et al., 2014,  
68 Hu et al., 2018, Kelly et al., 2018]. sRNAs are found in all domains of life and have been shown  
69 to play critical regulatory roles in many processes [Cech and Steitz, 2014], [Michaux et al., 2014],  
70 [Robledo et al., 2018], [Gottesman and Storz, 2011], [Livny and Waldor, 2007], [Nitzan et al., 2017].  
71 Most sRNAs characterised to date act as post-transcriptional regulators by interacting with  
72 specific mRNA targets. Feedback loops involving sRNAs can be found in natural biological pro-  
73 cesses, for example in the regulation of the expression of quorum-sensing genes [Liu et al., 2013]  
74 and in the promotion of a switch for adequate Lrp-dependent adaptation to nutrient availability  
75 [Holmqvist et al., 2012]. Post-transcriptional down-regulation is favourable since no proteins are  
76 being expressed in this regulation mechanism. Instead, sRNAs are produced quickly, potentially  
77 propagating signals rapidly [Holmqvist et al., 2012, Hussein and Lim, 2012, Mehta et al., 2008,  
78 Takahashi et al., 2014] and require less energy than proteins, hence reducing the burden to the  
79 host. Their operational dynamics are also much faster due to their naturally high degrada-  
80 tion rate [Hussein and Lim, 2012]. Therefore, sRNAs provide a promising alternative to the  
81 commonly used transcriptional control [Steel et al., 2017, Agrawal et al., 2018].

82 In this work, we considered two sRNA-based designs to filter variations in transcription,  
83 shown in Figure 1. In the first design the regulatory sRNA is placed under the control of a *sepa-*  
84 *rate* promoter to the one controlling transcription of a target gene (henceforth *in trans* design).  
85 In the second design, the sRNA is placed directly downstream of the target gene *in cis* so that  
86 both are under the control of the *same* inducible promoter. The *in cis* design also contains a  
87 self-cleaving ribozyme between the regulated mRNA and the sRNA sequences, as experiments  
88 demonstrated that the mRNA-sRNA strand needs to be separated for the translational attenu-  
89 ation to be efficient. We computationally showed the benefits of the *in cis* in comparison to the  
90 *in trans* design. While modelling the two circuits and performing numerical simulations showed  
91 that the mean steady-state values in both design are attenuated at similar levels, it was evident  
92 that the *in cis* design reduces noise significantly, while the *in trans* design can adversely amplify  
93 it. Modelling also revealed that the *in trans* design operates approximately as a feedforward  
94 filter, in that its output is the mRNA available after sRNA regulation while the *in cis* design  
95 also contains a feedback component, in that the free sRNA produced by self-cleavage of the  
96 ribozyme can regulate the amount of mRNA-sRNA transcript available for cleavage.

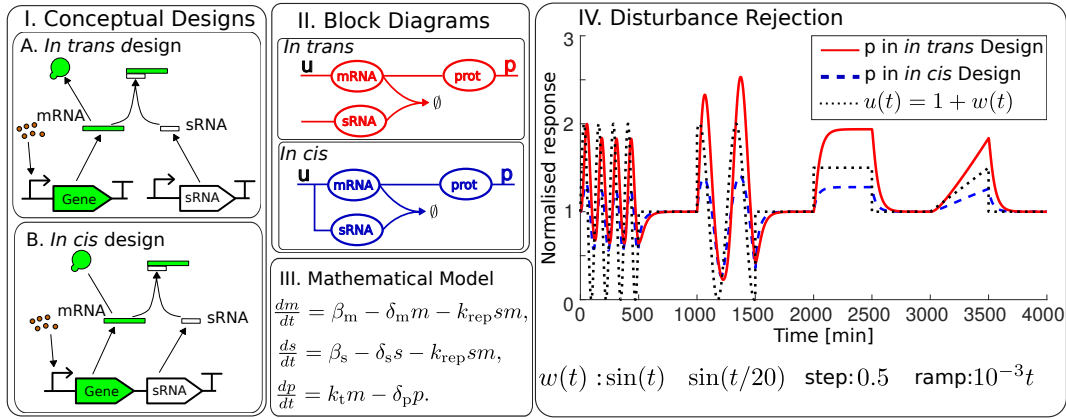

Figure 1: I. Two conceptual designs of filters using sRNA. In the *in trans* design, the mRNA and the sRNA are under two separate promoters, while in the *in cis* design the sRNA is placed downstream of the mRNA under the same promoter. II. Block diagrams of the *in trans* and *in cis* designs. III. Mathematical model for the designs. In the *in cis* design, we have  $\beta_m = \beta_s = \beta_{ms}$ , where  $\beta_{ms}$  is the production rate of mRNA and sRNA in the *in cis* design. IV. Improved disturbance rejection in the *in cis* design. In both designs, the perturbation was applied on the mRNA production rate. In the *in trans* design,  $\beta_m = u(t) = 1 + w(t)$  [nM/min] and in the *in cis* design  $\beta_{ms} = 1 + w(t)$  [nM/min]. In the plot, the protein concentrations were normalised by dividing by the steady-state expression of the models with  $\beta_m = \beta_{ms} = 1$  [nM/min]. The simulations show that the signal  $w(t)$  is attenuated more efficiently in the *in cis* design than the *in trans* design. These simulations also indicate that the transcription noise should be attenuated more efficiently in the *in cis* design.

97 As the *in cis* design also attenuates the mean steady-state of the signal, this module can also  
 98 be used in feedback control in order to reduce the strength of the feedback. We demonstrate the  
 99 value of the *in cis* design on the  $P_{tet}$ /TetR autorepressor. Here, sRNA is used to tune the TetR  
 100 feedback strength without modifying the rest of the system. Our numerical simulations suggest  
 101 that the *in cis* design offers a tunable response in terms of the mean output while attenuating  
 102 transcription noise.

## 103 2 Results

### 104 2.1 Conceptual designs of sRNA-based filters

We first considered the conceptual designs of the *in trans* and *in cis* filters depicted in Figure 1.I (and as block diagrams in Figure 1.II), which can be modelled using a similar set of reactions. In the *in trans* design we assumed the following reactions:

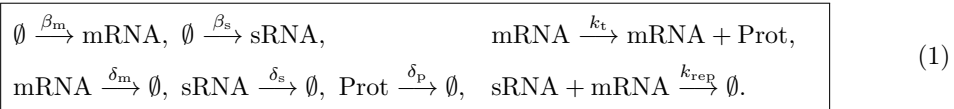

105 where Prot denotes a protein, which is the filter output. In this design, mRNA and sRNA are  
 106 transcribed in two different chemical reactions with rates  $\beta_m$ ,  $\beta_s$ , respectively.

In the *in cis* design, however, mRNA and sRNA are transcribed in the same reaction with the same transcription rate  $\beta_{ms}$ , so that this model takes the form

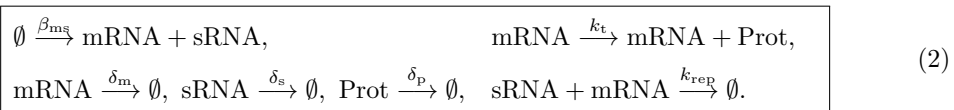

107 This assumes that the transcribed strand containing mRNA and sRNA splits into mRNA and  
 108 sRNA instantaneously. This conceptual (or ideal) representation drove the biological implemen-  
 109 tation discussed later in the text.

110 In both designs we assumed that mRNA is translated into a protein at the rate  $k_t$  and that the  
 111 degradation/dilution rate for every species is different, as mRNA generally degrades faster than  
 112 proteins and the reported values for the degradation rate of sRNA vary [Hussein and Lim, 2012].  
 113 We also assumed that the rate of mRNA-sRNA unbinding is negligibly small, as previously  
 114 reported [Hussein and Lim, 2012, Kelly et al., 2018], and therefore we did not include it in our  
 115 model. Modelling both designs using mass-action kinetics yielded the model presented in Figure  
 116 1.III, with the difference that for the *in cis* design, we have  $\beta_m = \beta_s = \beta_{ms}$ .

117 Note that while sRNA down-regulates the translation process in both designs, the two designs  
 118 lead to different responses to disturbances in the mRNA transcription process. Indeed, the *in cis*  
 119 design should be able to attenuate the transcription disturbance better since for every molecule  
 120 of mRNA produced, so is one molecule of sRNA. Therefore, a burst in transcription of mRNA  
 121 would also result in a burst in transcription of sRNA. To illustrate the response to disturbances  
 122 in transcription, we varied the production rate of mRNA in both systems simultaneously, that  
 123 is we used  $\beta_m = \beta_{ms} = u(t) = 1 + w(t)$  [nM/min], where  $w(t)$  is the disturbance signal (see  
 124 Figure 1.IV for the used signals  $w(t)$ ), and we set  $\beta_s = 1$  [nM/min],  $k_{rep} = 0.5$  [1/(nM min)],  
 125  $\delta_m = 0.2476$  [1/min],  $\delta_s = 0.0482$  [1/min],  $\delta_p = 0.0234$  [1/min] and  $k_t = 1$  [1/min] (see  
 126 Table S1 in SI). The results of the simulation are shown in Figure 1.IV, where the protein  
 127 concentrations with  $\beta_m = \beta_{ms} = u(t)$  were divided by the steady-state protein concentrations  
 128 with  $\beta_m = \beta_{ms} = 1$  giving the normalised response. The results clearly indicate that the *in cis*  
 129 design attenuates the disturbance better than the *in trans* design.

## 130 2.2 Biological implementation of the *in cis* design

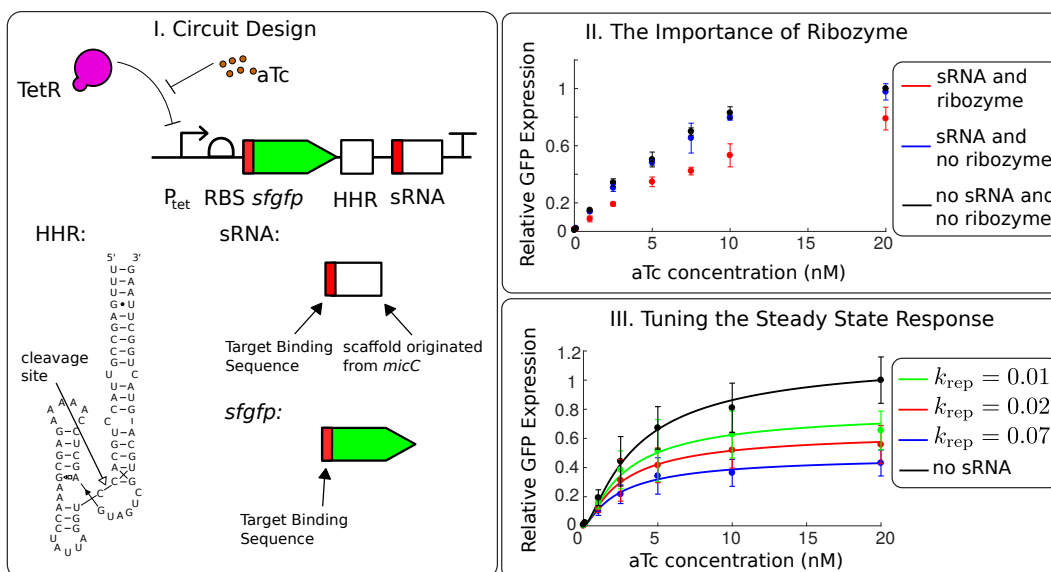

Figure 2: Implementation of the *in cis* filter. I. Experimental design: sfGFP and sRNA are placed under the control of a  $P_{tet}$  promoter and separated by an HHR9 ribozyme. The schematics for the ribozyme and the synthetic sRNA are adapted from [Perreault et al., 2011] and [Yoo et al., 2013], respectively. II. Importance of the ribozyme for efficient attenuation. Fluorescence output measured at different aTc concentrations for designs with and without HHR9, compared to the fluorescence of a system without sRNA attenuation. III. Fine tuning the attenuation level. Fluorescence output measured for varying length of the target binding sequence (TBS) at different aTc concentrations. Solid lines correspond to model predictions.

### 131 2.2.1 Importance of mRNA-sRNA cleavage in the *in cis* design

132 Next we constructed the *in cis* design in the laboratory and to test experimentally whether  
133 controlled attenuation could be achieved using this design. To further minimize the burden  
134 on the cell, we chose to use a low copy number plasmid as the vector to implement our *in*  
135 *cis* RNA-based attenuator design (Table S4 in SI). We also chose to use  $P_{tet}$  as the inducible  
136 promoter as it offers tight regulation in response to aTc. As a proof-of-principle, we chose  
137 sfGFP as the output to be attenuated. The synthetic regulatory sRNA was designed fol-  
138 lowing the protocol described by [Na et al., 2013, Yoo et al., 2013], in which we changed the  
139 binding sequence to target *sfGFP*. The sequence of our construct hence consists of an *sfGFP*,  
140 ribozyme, the synthetic sRNA consisting of the target binding sequence (TBS) followed by an  
141 Hfq-recruiting *micC* scaffold. Based on [Yoo et al., 2013], we chose a 25-nucleotide long se-  
142 quence as a starting point for the TBS. Using the web-based service DINAMelt, this sequence  
143 gave a  $\Delta G = -30.4 \text{ kcal} \cdot \text{mol}^{-1}$ , in line with full translation inhibition in [Yoo et al., 2013].  
144 We also hypothesized that the sRNA should be cleaved off the mRNA strand for efficient  
145 binding and translation inhibition. We therefore introduced a self-cleaving ribozyme, the Hu-  
146 man Hammerhead Ribozyme 9 (HHR9) shown to work well *in vivo* [De la Peña et al., 2003,  
147 De La Peña and García-Robles, 2010, Perreault et al., 2011], between *sfGFP* and the sRNA.

148 We monitored cell fluorescence over time in response to varying levels of aTc for two con-  
149 structs, one with no ribozyme and one carrying HHR9, and compared them with the fluorescence  
150 from cells lacking the ribozyme/sRNA part. Figure 2.II shows the steady-state levels of normal-  
151 ized fluorescence for each strain. Attenuation of the output is only observed for the construct  
152 expressing the HHR9 ribozyme, confirming our hypothesis that cleavage of the sRNA from the  
153 target mRNA is necessary for efficient translation inhibition.

### 154 2.2.2 Fine tuning the steady-state level

155 We next tested the possibility of fine tuning the level of attenuation by modifying the TBS  
156 of the sRNA, following the protocol described in [Yoo et al., 2013]. To do so, we decided to  
157 either increase or decrease the length of the TBS in the construct with the HHR9 ribozyme,  
158 leading to an increase and decrease of the translation inhibition, respectively. We estimated  
159 the different binding energies using DINAMelt and chose four different new sequence lengths  
160 to test: 30-, 27- and 22-nucleotides long, giving binding energies  $\Delta G = -38.2 \text{ kcal} \cdot \text{mol}^{-1}$ ,  
161  $\Delta G = -31.6 \text{ kcal} \cdot \text{mol}^{-1}$ ,  $\Delta G = -28.6 \text{ kcal} \cdot \text{mol}^{-1}$ , respectively. We monitored the cell  
162 fluorescence over time in response to varying levels of aTc for each construct. Figure 2.III  
163 shows the output of the system for the different binding energies, displayed as the normalised  
164 fluorescence plotted against different aTc concentrations. The output can be reduced to 40% of  
165 the signal (for the longest TBS tested) and its value can be varied by altering the length of the  
166 TBS, as predicted.

## 167 2.3 Modelling and analysis of the *in cis* filter

### 168 2.3.1 Modelling the *in cis* filter

Having established that the conceptual designs can be implemented experimentally, we pro-  
ceeded with a more detailed mathematical model to understand further their properties. For  
convenience we labelled the mRNA of GFP as mGFP. We assumed that self-cleavage of the  
ribozyme takes place after transcription of the full RNA, that is, mGFP-ribozyme-sRNA (la-  
belled fmRNA) is cleaved into mGFP and sRNA with a rate  $k_{rc}$ . We assumed that sRNA  
binds to mGFP preventing GFP translation. We also assumed that sRNA can bind to fmRNA,  
which can then self-cleave into sRNA and an mGFP-sRNA complex. Since experimental data  
suggests that the presence of a ribozyme is essential for sRNA and mRNA binding in the *in cis*  
design, we assumed that fmRNA (mGFP-ribozyme-sRNA strand) does not bind to the target  
mRNA (mGFP). We assumed that GFP can be translated both from mGFP and fmRNA. The  
other reactions were assumed to be the same as for the *in trans* design, leading to the following

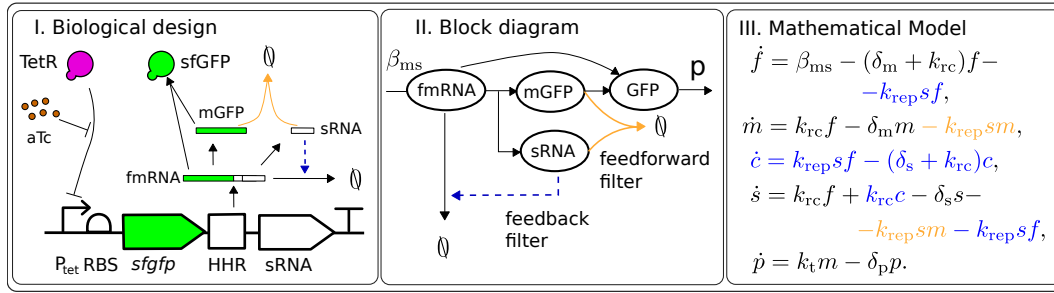

Figure 3: I. A biological implementation of the *in cis* design. fmRNA denotes the RNA strand containing mGFP (mRNA of GFP), ribozyme and sRNA. The sRNA-mGFP interaction forms the feedforward part of the filter, while the fmRNA-sRNA interaction forms the feedback part of the filter. The dashed line between sRNA to the fmRNA degradation signifies that sRNA binds to fmRNA forming a complex that cleaves into an inert mGFP-sRNA complex and another sRNA copy, thus the sRNA copy number does not decrease. II. Block diagram of the *in cis* design. III. A mathematical model of the *in cis* design, where  $f$ ,  $m$ ,  $c$ ,  $s$ , and  $p$  denote the concentrations of fmRNA, mGFP, sRNA:fmRNA complex, sRNA and GFP, respectively. For the chosen parameter values, the term  $k_{rc}c - k_{rep}sf$  remains close to zero, therefore, it does not significantly affect the equation of the sRNA concentration ( $s$ ) and we can assume that sRNA degrades fmRNA directly.

chemical reaction model:

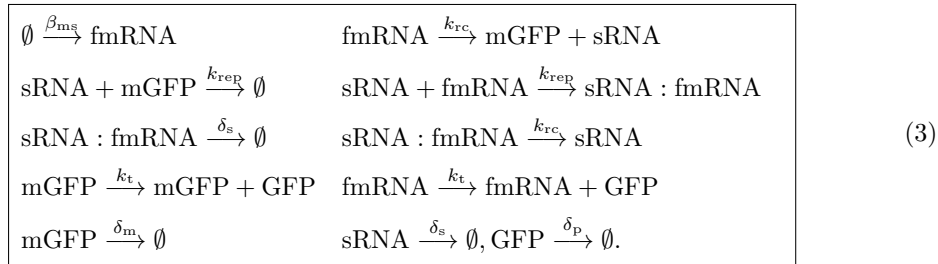

169 We followed the standard mass-action kinetics modelling framework and obtained the model  
 170 presented in Figure 3.III. We analysed the resulting model as described in the SI. In particular,  
 171 the frequency domain analysis showed that both *in cis* and *in trans* designs implement a low-pass  
 172 filter attenuating high frequency noise. For realistic parameter values the term  $k_{rc}c - k_{rep}sf$  in  
 173 Figure 3 remains close to zero, therefore, it does not significantly affect the equation of the sRNA  
 174 concentration ( $s$ ) and we hence pictorially represent that sRNA directly degrades fmRNA in  
 175 Figure 3.I. Depicting the *in cis* design in the block diagram in Figure 3.II revealed the structure  
 176 of the filter. The mGFP and sRNA interaction represents *the feedforward part* of the filter from  
 177 the transcription initiation, since sRNA and mGFP are produced at similar time instances and  
 178 sRNA binds to mRNA forming an inert complex. There is also a *feedback part* in this design  
 179 formed by the sRNA and the fmRNA interaction. Indeed, fmRNA self-cleaves into mGFP and  
 180 sRNA, which then binds to fmRNA forming the complex, which contains a ribozyme and splits  
 181 to an inert complex mGFP-sRNA and a free sRNA.

We also derived a non-dimensional model of the *in cis* design, which clearly exhibited time-scale separation between the quantities  $f + m$ ,  $s$ ,  $p$  on one side and  $f$ ,  $c$  on the other (see SI for details). This allowed the derivation of a simplified deterministic model of the *in cis* filter

$$\begin{aligned}
 \frac{d}{dt} m_{\text{tot}} &= \beta_{ms} - \delta_m m_{\text{tot}} - k_{rep} s m_{\text{tot}}, \\
 \frac{d}{dt} s &= \frac{k_{rc}}{\delta_m + k_{rc}} \beta_{ms} - \delta_s s - k_{rep} s m_{\text{tot}}, \\
 \frac{d}{dt} p &= k_t m_{\text{tot}} - \delta_p p.
 \end{aligned} \tag{4}$$

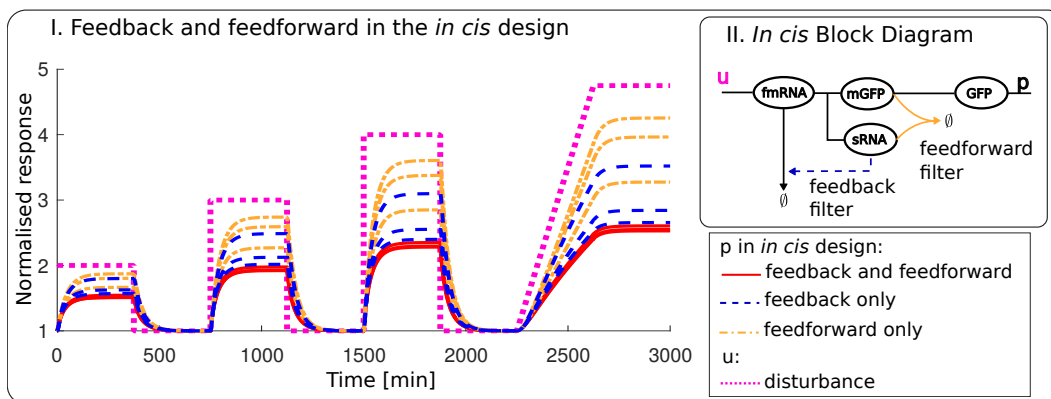

Figure 4: I. The significance of the feedback part of the filter validated by deterministic *in silico* analysis of the *in cis* design. The simulations are performed with and without feedforward/feedback, and  $\beta_{ms} = \beta_{ms}^0 u(t)$ ,  $\beta_{ms}^0 = [0.1, 0.5, 1]$  [nM/min]. Knocking out the sRNA feedback results in weaker signal repression than knocking out the sRNA feedforward. II. Block diagram of the *in cis* design.

182 where  $m_{tot}$  is the total concentration of fmRNA and mGFP. The key assumption for this analysis  
 183 was the faster ribozyme cleavage rate in comparison to other reactions. Further investigation  
 184 revealed strong stability properties of the simplified model, in particular, we ruled out oscillations  
 185 and multiple steady-states under some assumptions.

186 Our analysis suggests a possible tuning dial in the *in cis* design: the ribozyme (with cleavage  
 187 rate  $k_{rc}$ ) can be used to adjust the gain of the output attenuation, as well as the sRNA-mGFP  
 188 binding strength  $k_{rep}$ . With the ribozyme cleavage rate increasing, the deterministic model for  
 189 this system converges to the ‘ideal’ model of the conceptual design, however, the reported values  
 190 of the ribozyme cleavage rate  $k_{rc}$  are not large enough for us to assume that  $\frac{k_{rc}}{k_{rc} + \delta_m} \approx 1$  and so  
 191 that we cannot discard the ribozyme cleavage rate completely. While the simplified model was  
 192 useful for the analysis and revealed the mathematical difference between the *in cis* and *in trans*  
 193 designs, it hid the feedback part of the filter. This raised the question if the feedback part of  
 194 the filter has a significant effect on the repression of translation.

### 195 2.3.2 *In silico* evidence of the feedback in the *in cis* design

196 Here we evaluated the influence of the feedback on the repression of translation. We performed  
 197 model simulations of the *in cis* design, and the models of *in cis* design without the feedforward  
 198 part (mGFP and sRNA binding) and without the feedback part (fmRNA and sRNA binding).  
 199 We set  $k_{rep} = 0.5$  [1/(nM min)],  $k_{rc} = 5$  [1/min],  $\delta_m = 0.2476$  [1/min],  $\delta_s = 0.048$  [1/min],  
 200  $\delta_p = 0.0234$  [1/min] and  $k_t = 1$  [1/min] (see Table S1 in SI). We replaced the production  
 201 rate of fmRNA  $\beta_{ms}$  in all three systems with  $\beta_{ms} = \beta_{ms}^0 u(t)$ , where  $u(t)$  is the disturbance  
 202 signal depicted by dashed purple line in Figure 4.I and  $\beta_{ms}^0 = [0.1, 0.5, 1]$  [nM/min]. We  
 203 plot the response of the systems divided by the response with  $u(t) \equiv 1$ . Numerical simulations  
 204 presented in Figure 4.I clearly suggest that the feedback part of the filter has a larger influence  
 205 on the steady-state behaviour than the feedforward part even with a high ribozyme cleavage  
 206 rate  $k_{rc} = 5$  [1/min].

### 207 2.3.3 *In cis* filter improves the noise properties of the signal

208 The simulations of the conceptual model suggest that the *in cis* design attenuates intrinsic  
 209 noise of the promoter in a much more efficient way than the *in trans* design. We verified  
 210 this hypothesis by performing stochastic simulations using the Gillespie Algorithm with the  
 211 parameters/parameter ranges in Table S1. We considered the coefficient of variation as a noise  
 212 metric (Figure 5). We plotted the coefficient of variation relative to the mean steady-state for  
 213 each design. These numerical simulations suggest that the *in trans* design has a very narrow

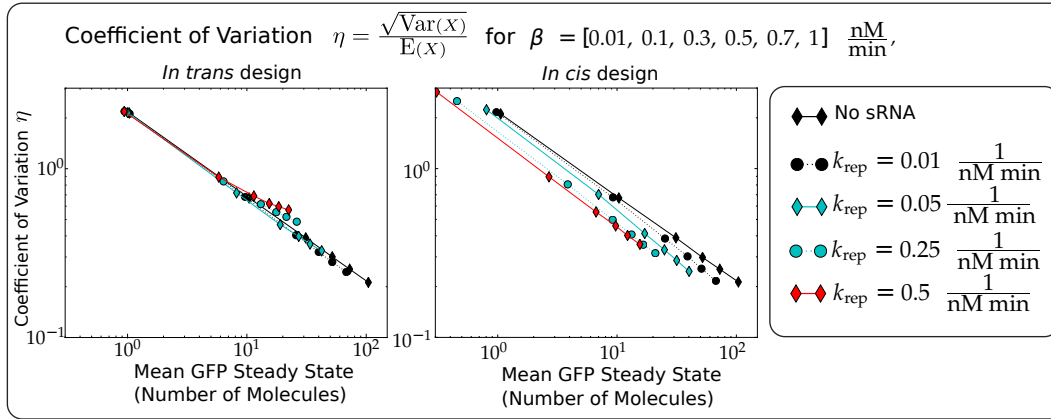

Figure 5: *In cis* filter effectively reduces noise in comparison to *in trans* filter. Data points for each line correspond to different values of  $\beta$  from [0.01, 0.1, 0.3, 0.5, 0.7, 1] [nM/min]. Every line corresponds to a different repression sRNA-mRNA binding strength  $k_{\text{rep}}$ . For the *in trans* design we set  $\beta_m = \beta_s = \beta$ , for the *in cis* design we set  $\beta_{\text{ms}} = \beta$ . For a particular value of mean GFP steady-state, we can obtain lower coefficient of variation (meaning lower noise) in the *in cis* design in comparison to the *in trans* design and the ‘no sRNA’ case. For example, for an average  $\mathbb{E}(\text{GFP}) = 10.4$  molecules we have  $\beta = 0.1$  [nM/min],  $\eta = 0.67$  without the sRNA repression, for  $k_{\text{rep}} = 0.5$  [1/(nM min)] we have  $\mathbb{E}(\text{GFP}) = 9.29$  molecules,  $\eta = 0.49$ ,  $\beta = 0.3$  [nM/min] in the *in cis* design and  $\mathbb{E}(\text{GFP}) = 11.45$  molecules,  $\eta = 0.69$ ,  $\beta = 0.3$  [nM/min] for the *in trans* design.

214 range of  $k_{\text{rep}}$  values for which noise is attenuated, when compared to the circuit with no sRNA  
 215 (or  $k_{\text{rep}} = 0$ ) while the *in cis* design attenuates noise for almost all values of  $k_{\text{rep}}$ . An example  
 216 is presented in the caption of Figure 5, while the numerical values are given in Table S2 in SI.  
 217 This analysis suggests a simple method to design the *in cis* filter: choose the maximum possible  
 218 combination of  $\beta_{\text{ms}}$ ,  $k_{\text{rep}}$  that achieves the desired GFP mean values.

219 Additional simulations (see Figure S3 in SI) for the *in cis* design revealed that the level of  
 220 noise attenuation can be tuned by several parameters: the repression strength  $k_{\text{rep}}$ , the ribozyme  
 221 cleavage rate  $k_{\text{rc}}$  and the degradation rate of sRNA  $\delta_s$ . In particular, increasing the ribozyme  
 222 cleavage rate  $k_{\text{rc}}$  or the sRNA degradation rate  $\delta_s$  lead to a decrease in the noise levels.

## 223 2.4 *In cis* module tunes the feedback strength and reduces noise in 224 the TetR autorepressor

We then proceeded to investigate how the two modules behave in a feedback interconnection, such as for example when an *tetR-gfp* fusion gene is placed under the control of a  $P_{\text{tet}}$  promoter. In this case, we expect the TetR being produced to repress the activity of  $P_{\text{tet}}$  (Figure 6.I). We consider the following chemical reactions for the *in trans* design:

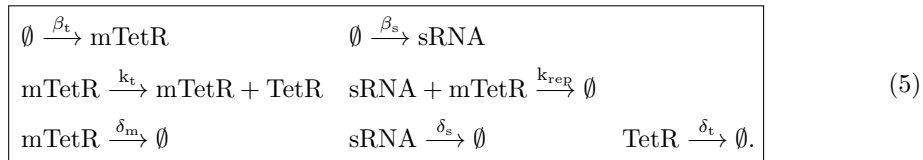

225 Here, GFP production is not modelled since it is fused to TetR and only serves as a reporter  
 226 on TetR production. Both TetR and sRNA are controlled by  $P_{\text{tet}}$  (see SI for a full model  
 227 description). We assume that the rest of the interactions follow mass action kinetics.

We assume that  $\beta_t = \beta_s$  to aid comparison with the *in cis* design, which can be modelled



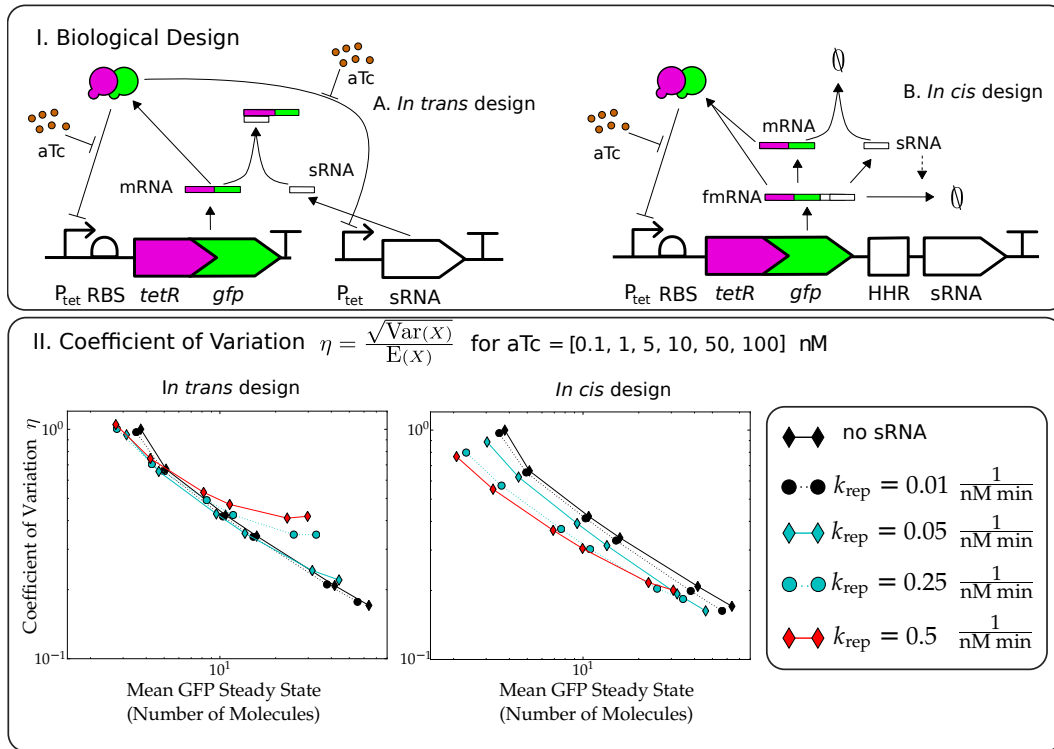

Figure 6: Improvement of the autorepressor design. I. Conceptual designs of the *in trans* and the *in cis* feedback strength regulators of the autorepressor. II. *In cis* filter effectively reduces noise in comparison to *in trans* filter, while both tune the feedback strength. We plot the coefficient of variation versus the mean GFP steady-state. Every data point corresponds to a different aTc concentration from [0.1, 1, 5, 10, 50, 100] [nM]. Every line corresponds to a different repression strength  $k_{\text{rep}}$ . For a particular value of mean GFP steady-state, we can obtain a lower coefficient of variation (meaning lower noise) in the *in cis* design in comparison to the *in trans* design and the ‘no sRNA’ case, which corresponds to the classical autorepressor in both plots. For example, for an average  $\mathbb{E}(\text{TetR}) = 10.7$  molecules we have  $[\text{aTc}] = 5$  [nM],  $\eta = 0.42$  with the classical autorepressor (no sRNA), for  $k_{\text{rep}} = 0.25$  [1/(nM min)] and  $[\text{aTc}] = 10$  [nM] we have  $\mathbb{E}(\text{TetR}) = 10.9$  molecules,  $\eta = 0.30$  in the *in cis* design and  $\mathbb{E}(\text{TetR}) = 11.78$  molecules,  $\eta = 0.42$  in the *in trans* design.

using the following chemical reactions:

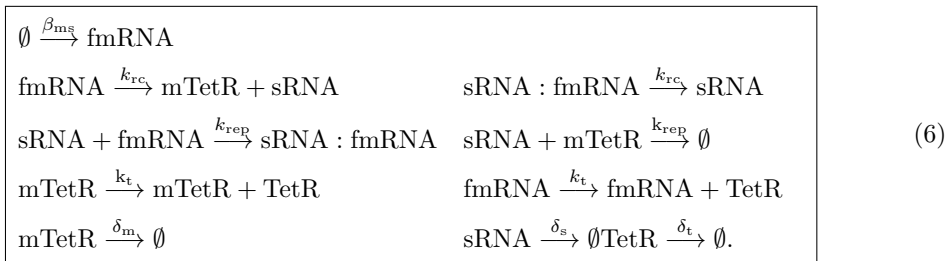

228 For the stochastic simulations in Figure 6.II we used the parameters/parameter ranges in  
 229 Table S1 and additionally set  $k_{\text{rc}} = 1$  [1/min],  $k_{\text{t}} = 1$  [1/min]. These simulations suggest that the  
 230 *in cis* design attenuates noise better in comparison with the no sRNA (classical autorepressor)  
 231 circuit for a wider range of parameters than the *in trans* design. Note that with sufficient  
 232 increase of the feedback strength the noise levels can be amplified by the *in trans* design, which is  
 233 consistent with previous studies [Kelly et al., 2018]. In our *in cis* design the noise amplification  
 234 does not occur for the simulated range of parameters (noise amplification is still possible for

larger aTc concentrations). Furthermore, for a particular mean TetR level we can always select a combination of the sRNA repression strength  $k_{\text{rep}}$  and the aTc concentration so that the coefficient of variation is reduced in comparison to ‘no sRNA’ (see caption to Figure 6.II). In the *in trans* design these tuning dials are less effective: the noise reduction can be insignificant or the sRNA repression strength is very small, which means that the *in trans* approach is not appropriate for noise reduction. The noise analysis suggests that the repression rate  $k_{\text{rep}}$  adds a valuable tuning dial to the feedback strength design along with the aTc concentration. The numerical values of these simulations are given in Table S3 in SI.

### 3 Discussion

In this paper, we report the design of an sRNA-based feedback filter where the regulatory sRNA is placed directly after the gene to regulate *in cis* the signal, resulting in a filtered output. Modelling this new design, we showed that it can improve noise attenuation significantly compared to an *in trans* filter design and a no filter (no sRNA) design. Our results clearly indicate that the *in cis* design adapts better to the inputs than the *in trans* design mainly due to the presence of the feedback component. Moreover, in the *in cis* system, the production rate of the mRNA and sRNA change simultaneously, attenuating the transcription disturbance better than in the *in trans* design, where the relative gene expression rate varies significantly due to the sRNA and mRNA transcription rate being decoupled. Lastly, our *in cis* design requires less cellular resources (e.g. RNA polymerase), decreasing the burden imposed on the cell.

We successfully implemented this new sRNA-based filter *in vivo*. Our approach, using synthetic sRNA as described by [Na et al., 2013, Yoo et al., 2013] allows not only attenuation but also fine tuning to a desired output. Indeed, altering the length of the target binding sequence (TBS) allows varying the strength of the sRNA-mRNA binding, therefore leading to different levels of attenuation. We tested several length (from 22 to 30 nucleotides long) and could attenuate the output of the filter down to 40% of the unregulated output, very close to the values reported in other *in trans* designs [Kelly et al., 2018]. Increasing the length of the TBS should in theory allow higher attenuation levels, although off-target binding might then have to be taken in account [Na et al., 2013, Yoo et al., 2013]. Recently a similar architecture was proposed in mammalian cells [Lillacci et al., 2018], where micro RNA was placed *in cis* with the regulated gene. In our system, placing the synthetic sRNA *in cis* with the target mRNA without the ribozyme did not yield positive results. We showed, however, that the targeted mRNA and the regulatory sRNA have to be cleaved from each other for efficient output attenuation. Such cleavage was achieved by placing a self-cleaving hammerhead ribozyme (the HHR9 ribozyme) between the mRNA and the sRNA. The ribozyme represents another tuning dial allowing further fine tuning of the system. The ribozyme/synthetic sRNA approach, other than providing tuning dials such as the ribozyme cleavage rate and the repression strength, has another advantage: the repressing molecule is free from the active one, limiting possible unwanted effects. The emergence of synthetic ribozymes (self-cleaving or cleaving in response to a signal) should allow greater tuning flexibility.

Modelling both the *in cis* and *in trans* designs showed the clear advantages of the former design over the latter. While the mean steady-state behaviour of the two designs is quantitatively similar, the noise levels differ. In particular, the *in cis* design attenuates the transcription noise more efficiently thanks to the simultaneous bursts in transcription for the sRNA and the mRNA and the presence of feedback. Modelling suggests that the feedback strength in the filter is proportional to the ribozyme cleavage rate adding another benefit to the development of synthetic fast-cleaving ribozymes.

Further theoretical analysis showed that our design is a useful tool for feedback control design. We showed that the *in cis* design is well suited to tune down the feedback strength in a transcriptional based controller such as the TetR autorepressor. Again, the *in cis* design has superior noise properties in comparison to the *in trans* design. These findings are consistent with previously reported studies [Laurenti et al., 2018], where a Linear Noise Approximation [Van Kampen, 2007] was used to perform the noise attenuation analysis. Indeed, in a feedback setting, a given mean steady-state value can be achieved through either acting on the signal

288 level (in our case aTc) or the strength of the feedback (in our case mRNA-sRNA binding): the  
289 *in cis* design offers a wide range of parameters achieving the same mean steady-state values  
290 with lower noise levels.

291 In this paper we presented a new sRNA-based feedback filter module. Together with the  
292 fast dynamics at which RNA operates, our *in cis* architecture is a simple, modular and tunable  
293 construct that can be applied in a wide range of synthetic biology applications while keeping  
294 the burden imposed on the cell at a minimum level.

## 295 Author Contributions

296 ND and AS contributed equally to this work. Conceptualization, GHW and AP; Methodology,  
297 ND, AS, AP, GHW; Investigation, ND; Formal Analysis, AS; Writing - Original Draft, ND, AS;  
298 Writing - Review & Editing, ND, AS, AP, GHW; Funding Acquisition, AP; Resources, AP and  
299 GHW.

## 300 Acknowledgements

301 The authors would like to thank Prof J.Keasling for providing a plasmid, Prof De la Peña  
302 for advising on the hammerhead ribozyme. This work is supported by UK's Engineering and  
303 Physical Sciences (EPSRC) Grant EP/M002454/1.

## 304 Declaration of Interests

305 The authors declare no competing interests.

## 306 4 STAR Methods

### 307 4.1 Key resources table

308

| REAGENT OR RESOURCE                           | REFERENCE                                              | IDENTIFIER                                                                                                                        |
|-----------------------------------------------|--------------------------------------------------------|-----------------------------------------------------------------------------------------------------------------------------------|
| CHEMICALS, PEPTIDES, AND RECOMBINANT PROTEINS |                                                        |                                                                                                                                   |
| anhydrous tetracycline                        | TOKU-E                                                 | T055                                                                                                                              |
| EXPERIMENTAL MODELS: ORGANISMS/STRAINS        |                                                        |                                                                                                                                   |
| <i>E. coli</i> : MG1655                       | [Blattner et al., 1997]                                | ATCC47076                                                                                                                         |
| RECOMBINANT DNA                               |                                                        |                                                                                                                                   |
| Plasmid: pBbS2a-RFP                           | Shared by Prof J. Keasling [Lee et al., 2011]          | addGene: 35328                                                                                                                    |
| Plasmid: pND113                               | This work                                              | will be provided by GenBank                                                                                                       |
| Plasmid: pND149                               | This work                                              | will be provided by GenBank                                                                                                       |
| Plasmid: pND179                               | This work                                              | will be provided by GenBank                                                                                                       |
| Plasmid: pND218                               | This work                                              | will be provided by GenBank                                                                                                       |
| Plasmid: pND219                               | This work                                              | will be provided by GenBank                                                                                                       |
| Plasmid: pND221                               | This work                                              | will be provided by GenBank                                                                                                       |
| SOFTWARE AND ALGORITHMS                       |                                                        |                                                                                                                                   |
| SnapGene                                      | GSL Biotech LLC                                        | <a href="http://www.snapgene.com">http://www.snapgene.com</a>                                                                     |
| DINAMelt                                      | [Markham and Zuker, 2005]<br>[Markham and Zuker, 2008] | <a href="http://mfold.rna.albany.edu/?q=DINAMelt/Two-state-melting">http://mfold.rna.albany.edu/?q=DINAMelt/Two-state-melting</a> |
| MATLAB R2016b                                 | MathWorks, Inc., Natick, MA, USA                       | <a href="http://www.mathworks.com">http://www.mathworks.com</a>                                                                   |
| cuda-sim                                      | [Zhou et al., 2011]                                    | <a href="https://github.com/jamesscottbrown/cuda-sim">https://github.com/jamesscottbrown/cuda-sim</a>                             |

## 309 4.2 Contact for resource sharing

310 Further information and requests for resources should be addressed to Prof Papachristodoulou  
311 ANTONIS@ENG.OX.AC.UK.

## 312 4.3 Method Details

### 313 4.3.1 Bacterial strains and plasmids

314 *Escherichia coli* MG1655 cells were used throughout this entire study unless stated other-  
315 wise. Plasmids were produced using standard cloning techniques. All synthetic DNA frag-  
316 ments (gBlocks) and primers used in this study were synthesized by Integrated DNA Tech-  
317 nologies Inc. The length of the target binding sequences within the sRNA sequence were esti-  
318 mated using the web-based service DINAMelt ([http://mfold.rna.albany.edu/?q=DINAMelt/](http://mfold.rna.albany.edu/?q=DINAMelt/Two-state-melting)  
319 [Two-state-melting](http://mfold.rna.albany.edu/?q=DINAMelt/Two-state-melting)). We used pBbS2a-RFP (JBEI-2549, shared by Prof. J. Keasling) as a  
320 backbone for all the plasmids made for this work [Lee et al., 2011]. A list and a description of  
321 plasmids used in this study can be found in Table S4 in SI. Sequences of all plasmids have been

322 submitted to GenBank. Full details are provided in SI.

### 323 4.3.2 Growth conditions and assays

324 Cells were grown overnight from single colonies to stationary phase in minimal medium 9 (M9)  
325 complemented with thiamine 0.34 mg/mL and ampicillin (100  $\mu$ g/mL) at 30° C with shaking  
326 and then diluted 1/100 into fresh M9 with ampicillin (100 $\mu$ g/mL) of cells were then loaded  
327 onto a 96-well plate (Corning) and left to grow for 2h at 30° C with shaking in a FLUOstar  
328 Omega Microplate Reader (BMG LABTECH). After this time, anhydrous tetracycline (aTc)  
329 at the appropriate concentration was added to the cells and measurements were acquired in  
330 the plate reader (gain: 1000). Absorbance and GFP fluorescence (excitation and emission  
331 wavelengths: 485 and 530 nm, with 20 nm bandwidth, respectively) were measured every 3  
332 minutes. Fluorescence was normalised by absorbance and plotted over time.

### 333 4.3.3 Mathematical modelling

334 We used mass action and Hill kinetic formalisms in order to model the chemical reactions as a  
335 Chemical Master Equation [Van Kampen, 2007]. The stochastic simulations were performed us-  
336 ing the modified version (<https://github.com/jamesscottbrown/cuda-sim>) of the software  
337 tool cuda-sim [Zhou et al., 2011], which implements the Gillespie stochastic simulation algo-  
338 rithm. The deterministic simulations were performed in MATLAB using a built-in ordinary  
339 differential equation solver ODE15S. The parameter fitting was performed using non-linear least  
340 squares routine FIT in MATLAB.

## 341 References

- 342 [Agrawal et al., 2018] Agrawal, D., Tang, X., Westbrook, A., Marshall, R., Maxwell, C., Lucks,  
343 J., Noireaux, V., Beisel, C., Dunlop, M. and Franco, E. (2018). Mathematical modeling of  
344 RNA-based architectures for closed loop control of gene expression. *ACS synthetic biology*  
345 *7*, 1219–1228.
- 346 [Ang and McMillen, 2013] Ang, J. and McMillen, D. (2013). Physical constraints on biological  
347 integral control design for homeostasis and sensory adaptation. *Biophysical journal* *104*,  
348 505–515.
- 349 [Åström and Murray, 2008] Åström, K. and Murray, R. (2008). *Feedback Systems: An Intro-*  
350 *duction for Scientists and Engineers*. Princeton University Press, Princeton, NJ, USA.
- 351 [Blattner et al., 1997] Blattner, F., Plunkett, G., Bloch, C., Perna, N., Burland, V., Riley, M.,  
352 Collado-Vides, J., Glasner, J., Rode, C., Mayhew, G. F. et al. (1997). The complete genome  
353 sequence of *Escherichia coli* K-12. *Science* *277*, 1453–1462.
- 354 [Briat et al., 2016] Briat, C., Gupta, A. and Khammash, M. (2016). Antithetic integral feedback  
355 ensures robust perfect adaptation in noisy biomolecular networks. *Cell systems* *2*, 15–26.
- 356 [Brophy and Voigt, 2014] Brophy, J. and Voigt, C. (2014). Principles of genetic circuit design.  
357 *Nat methods* *11*, 508–520.
- 358 [Cantone et al., 2009] Cantone, I., Marucci, L., Iorio, F., Ricci, M., Belcastro, V., Bansal, M.,  
359 Santini, S., Di Bernardo, M., Di Bernardo, D. and Cosma, M. (2009). A yeast synthetic  
360 network for in vivo assessment of reverse-engineering and modeling approaches. *Cell* *137*,  
361 172–181.
- 362 [Cech and Steitz, 2014] Cech, T. and Steitz, J. (2014). The noncoding RNA revolution—trashing  
363 old rules to forge new ones. *Cell* *157*, 77–94.
- 364 [Ceroni et al., 2015] Ceroni, F., Algar, R., Stan, G. and Ellis, T. (2015). Quantifying cellular  
365 capacity identifies gene expression designs with reduced burden. *Nature methods* *12*, 415.

- 366 [De la Peña et al., 2003] De la Peña, M., Gago, S. and Flores, R. (2003). Peripheral regions  
367 of natural hammerhead ribozymes greatly increase their self-cleavage activity. *The EMBO*  
368 *journal* *22*, 5561–5570.
- 369 [De La Peña and García-Robles, 2010] De La Peña, M. and García-Robles, I. (2010). Intronic  
370 hammerhead ribozymes are ultraconserved in the human genome. *EMBO reports* *11*, 711–  
371 716.
- 372 [Del Vecchio and Murray, 2015] Del Vecchio, D. and Murray, R. M. (2015). *Biomolecular feed-*  
373 *back systems*. Princeton University Press Princeton, NJ.
- 374 [Del Vecchio et al., 2008] Del Vecchio, D., Ninfa, A. J. and Sontag, E. D. (2008). Modular cell  
375 biology: retroactivity and insulation. *Molecular systems biology* *4*, 161.
- 376 [El-Samad et al., 2002] El-Samad, H., Goff, J. and Khammash, M. (2002). Calcium homeostasis  
377 and parturient hypocalcemia: an integral feedback perspective. *Journal of theoretical biology*  
378 *214*, 17–29.
- 379 [Folliard et al., 2017] Folliard, T., Steel, H., Prescott, T., Wadhams, G., Rothschild, L. and  
380 Papachristodoulou, A. (2017). A synthetic recombinase-based feedback loop results in robust  
381 expression. *ACS synthetic biology* *6*, 1663–1671.
- 382 [Freemont and Kitney, 2015] Freemont, P. and Kitney, R. (2015). *Synthetic Biology-a Primer*  
383 (revised Edition). World Scientific.
- 384 [Ghudasara and Voigt, 2017] Ghudasara, A. and Voigt, C. (2017). Balancing gene expression  
385 without library construction via a reusable sRNA pool. *Nucleic acids research* *45*, 8116–8127.
- 386 [Gottesman and Storz, 2011] Gottesman, S. and Storz, G. (2011). Bacterial small RNA regu-  
387 lators: versatile roles and rapidly evolving variations. *Cold Spring Harbor perspectives in*  
388 *biology* *3*, a003798.
- 389 [Haykin, 2002] Haykin, S. (2002). *Adaptive filter theory*.
- 390 [Holmqvist et al., 2012] Holmqvist, E., Unoson, C., Reimegård, J. and Wagner, E. (2012). A  
391 mixed double negative feedback loop between the sRNA MicF and the global regulator Lrp.  
392 *Molecular microbiology* *84*, 414–427.
- 393 [Hooshangi et al., 2005] Hooshangi, S., Thiberge, S. and Weiss, R. (2005). Ultrasensitivity and  
394 noise propagation in a synthetic transcriptional cascade. *Proceedings of the National Academy*  
395 *of Sciences* *102*, 3581–3586.
- 396 [Hsiao et al., 2014] Hsiao, V., De Los Santos, E., Whitaker, W., Dueber, J. and Murray, R.  
397 (2014). Design and implementation of a biomolecular concentration tracker. *ACS synthetic*  
398 *biology* *4*, 150–161.
- 399 [Hsiao et al., 2018] Hsiao, V., Swaminathan, A. and Murray, R. (2018). Control Theory for Syn-  
400 thetic Biology: Recent Advances in System Characterization, Control Design, and Controller  
401 Implementation for Synthetic Biology. *IEEE Control Systems* *38*, 32–62.
- 402 [Hu et al., 2018] Hu, C., Takahashi, M., Zhang, Y. and Lucks, J. (2018). Engineering a Func-  
403 tional small RNA Negative Autoregulation Network with Model-guided Design. *ACS syn-*  
404 *thetic biology* *7*, 1507–1518.
- 405 [Hussein and Lim, 2012] Hussein, R. and Lim, H. (2012). Direct comparison of small RNA and  
406 transcription factor signaling. *Nucleic acids research* *40*, 7269–7279.
- 407 [Iglesias and Ingalls, 2010] Iglesias, P. and Ingalls, B. (2010). *Control theory and systems biol-*  
408 *ogy*. MIT Press.
- 409 [Kelly et al., 2018] Kelly, C., Harris, A., Steel, H., Hancock, E., Heap, J. and Pa-  
410 pachristodoulou, A. (2018). Synthetic negative feedback circuits using engineered small RNAs.  
411 *Nucleic acids research* *46*, 9875–9889.

- 412 [Laurenti et al., 2018] Laurenti, L., Csikasz-Nagy, A., Kwiatkowska, M. and Cardelli, L. (2018).  
413 Molecular Filters for Noise Reduction. *Biophysical Journal* 114, 3000–3011.
- 414 [Lee et al., 2011] Lee, T., Krupa, R., Zhang, F., Hajimorad, M., Holtz, W., Prasad, N., Lee, S.  
415 and Keasling, J. (2011). BglBrick vectors and datasheets: a synthetic biology platform for  
416 gene expression. *Journal of biological engineering* 5, 12.
- 417 [Lillacci et al., 2018] Lillacci, G., Benenson, Y. and Khammash, M. (2018). Synthetic control  
418 systems for high performance gene expression in mammalian cells. *Nucleic acids research* 46,  
419 9855–9863.
- 420 [Liu et al., 2013] Liu, X., Zhou, P. and Wang, R. (2013). Small RNA-mediated switch-like  
421 regulation in bacterial quorum sensing. *IET systems biology* 7, 182–187.
- 422 [Livny and Waldor, 2007] Livny, J. and Waldor, M. (2007). Identification of small RNAs in  
423 diverse bacterial species. *Current opinion in microbiology* 10, 96–101.
- 424 [Markham and Zuker, 2005] Markham, N. and Zuker, M. (2005). DINAMelt web server for  
425 nucleic acid melting prediction. *Nucleic acids research* 33, W577–W581.
- 426 [Markham and Zuker, 2008] Markham, N. and Zuker, M. (2008). UNAFold. In *Bioinformatics*  
427 pp. 3–31. Springer.
- 428 [Mehta et al., 2008] Mehta, P., Goyal, S. and Wingreen, N. (2008). A quantitative comparison  
429 of sRNA-based and protein-based gene regulation. *Molecular systems biology* 4, 221.
- 430 [Menolascina et al., 2011] Menolascina, F., Di Bernardo, M. and Di Bernardo, D. (2011). Anal-  
431 ysis, design and implementation of a novel scheme for in-vivo control of synthetic gene regu-  
432 latory networks. *Automatica, Special Issue on Systems Biology* 47, 1265–1270.
- 433 [Michaux et al., 2014] Michaux, C., Verneuil, N., Hartke, A. and Giard, J.-C. (2014). Physio-  
434 logical roles of small RNA molecules. *Microbiology* 160, 1007–1019.
- 435 [Miliadis-Argeitis et al., 2011] Miliadis-Argeitis, A., Summers, S., Stewart-Ornstein, J., Zuleta, I.,  
436 Pincus, D., El-Samad, H., Khammash, M. and Lygeros, J. (2011). In silico feedback for in  
437 vivo regulation of a gene expression circuit. *Nat biotechnol* 29, 1114–1116.
- 438 [Muranaka and Yokobayashi, 2010] Muranaka, N. and Yokobayashi, Y. (2010). A synthetic  
439 riboswitch with chemical band-pass response. *Chemical communications* 46, 6825–6827.
- 440 [Na et al., 2013] Na, D., Yoo, S., Chung, H., Park, H., Park, J. and Lee, S. (2013). Metabolic  
441 engineering of *Escherichia coli* using synthetic small regulatory RNAs. *Nature biotechnology*  
442 31, 170.
- 443 [Nitzan et al., 2017] Nitzan, M., Rehani, R. and Margalit, H. (2017). Integration of bacterial  
444 small RNAs in regulatory networks. *Annual review of biophysics* 46, 131–148.
- 445 [Ozdemir et al., 2018] Ozdemir, T., Fedorec, A., Danino, T. and Barnes, C. (2018). Synthetic  
446 Biology and Engineered Live Biotherapeutics: Toward Increasing System Complexity. *Cell*  
447 systems 7, 5–16.
- 448 [Perreault et al., 2011] Perreault, J., Weinberg, Z., Roth, A., Popescu, O., Chartrand, P., Fer-  
449 beyre, G. and Breaker, R. (2011). Identification of hammerhead ribozymes in all domains of  
450 life reveals novel structural variations. *PLoS computational biology* 7, e1002031.
- 451 [Purnick and Weiss, 2009] Purnick, P. and Weiss, R. (2009). The second wave of synthetic  
452 biology: from modules to systems. *Nat. Rev. Mol. Cell Biol.* 10, 410–422.
- 453 [Robledo et al., 2018] Robledo, M., Schlüter, J., Linne, U., Albaum, S., Jiménez-Zurdo, J.,  
454 Becker, A. et al. (2018). An sRNA and cold shock protein homolog-based feedforward loop  
455 post-transcriptionally controls cell cycle master regulator CtrA. *Frontiers in microbiology* 9,  
456 763.

- 457 [Rosenfeld et al., 2002] Rosenfeld, N., Elowitz, M. and Alon, U. (2002). Negative autoregulation  
458 speeds the response times of transcription networks. *Journal of molecular biology* *323*, 785–  
459 793.
- 460 [Samoilov et al., 2002] Samoilov, M., Arkin, A. and Ross, J. (2002). Signal processing by simple  
461 chemical systems. *The Journal of Physical Chemistry A* *106*, 10205–10221.
- 462 [Sohka et al., 2009] Sohka, T., Heins, R., Phelan, R., Greisler, J., Townsend, C. and Ostermeier,  
463 M. (2009). An externally tunable bacterial band-pass filter. *Proc National Acad Sciences* *106*,  
464 10135–10140.
- 465 [Steel et al., 2017a] Steel, H., Harris, A., Hancock, E., Kelly, C. and Papachristodoulou, A.  
466 (2017a). Frequency domain analysis of small non-coding RNAs shows summing junction-like  
467 behaviour. In *Proc Conf Decision Control* pp. 5328–5333, IEEE.
- 468 [Steel et al., 2017b] Steel, H., Lillacci, G., Khammash, M. and Papachristodoulou, A. (2017b).  
469 Challenges at the interface of control engineering and synthetic biology. In *Proceedings of*  
470 *the IEE Conference on Decision and Control* pp. 1014–1023, IEEE.
- 471 [Takahashi et al., 2014] Takahashi, M., Chappell, J., Hayes, C., Sun, Z., Kim, J., Singhal, V.,  
472 Spring, K., Al-Khabouri, S., Fall, C., Noireaux, V. et al. (2014). Rapidly characterizing  
473 the fast dynamics of RNA genetic circuitry with cell-free transcription–translation (TX-TL)  
474 systems. *ACS synthetic biology* *4*, 503–515.
- 475 [Thattai and van Oudenaarden, 2002] Thattai, M. and van Oudenaarden, A. (2002). Attenua-  
476 tion of noise in ultrasensitive signaling cascades. *Biophysical journal* *82*, 2943–2950.
- 477 [Uhlendorf et al., 2012] Uhlendorf, J., Miermont, A., Delaveau, T., Charvin, G., Fages, F.,  
478 Bottani, S., Batt, G. and Hersen, P. (2012). Long-term model predictive control of gene  
479 expression at the population and single-cell levels. *Proc. Nat. Academy Sciences* *109*, 14271–  
480 14276.
- 481 [Van Kampen, 2007] Van Kampen, N. (2007). *Stochastic Processes in Physics and Chemistry*.  
482 Elsevier.
- 483 [Yoo et al., 2013] Yoo, S., Na, D. and Lee, S. (2013). Design and use of synthetic regulatory  
484 small RNAs to control gene expression in *Escherichia coli*. *Nature protocols* *8*, 1694.
- 485 [Zechner et al., 2016] Zechner, C., Seelig, G., Rullan, M. and Khammash, M. (2016). Molecular  
486 circuits for dynamic noise filtering. *Proc National Acad Sciences* *113*, 4729–4734.
- 487 [Zhou, 2016] Zhou, S. (2016). Synthetic biology: bacteria synchronized for drug delivery. *Nature*  
488 *536*, 33.
- 489 [Zhou et al., 2011] Zhou, Y., Liepe, J., Sheng, X., Stumpf, M. and Barnes, C. (2011). GPU  
490 accelerated biochemical network simulation. *Bioinformatics* *27*, 874–876.
